# Supplementary material for: Who Wants to Enhance Their Cognitive Abilities? Potential Predictors of the Acceptance of Cognitive Enhancement
Source: MDPI journal article supplement (doi:10.3390/jintelligence11060109), 2023-06-01
Supplement: s1 [file s1]

**Table S1***Correlations of Acceptance of Enhancement and Intelligence Sub-Facets (Exploratory Analyses)*

|                              | Passive Enhancement | Active Enhancement |
|------------------------------|---------------------|--------------------|
|                              | <i>r</i> [95% CI]   | <i>r</i> [95% CI]  |
| <b>Self-Estimation</b>       |                     |                    |
| Single-Item (IQ)             |                     |                    |
| Numerical Intelligence       | -.03 [-.16; .09]    | < -.01 [-.14; .13] |
| Verbal Intelligence          | -.04 [-.18; .09]    | .12* [-.01; .25]   |
| Spatial Intelligence         | -.05 [-.16; .06]    | .04 [-.10; .17]    |
| Multi-Item (Questionnaire)   |                     |                    |
| Numerical                    | -.07 [-.19; .06]    | -.04 [-.17; .08]   |
| Verbal                       | -.06 [-.19; .06]    | .13* [.01; .25]    |
| Spatial                      | -.08 [-.19; .04]    | .01 [-.11; .13]    |
| <b>Measured Intelligence</b> |                     |                    |
| Numerical Intelligence       | -.02 [-.14; .09]    | .11 [-.01; .22]    |
| Verbal Intelligence          | -.06 [-.19; .07]    | .12 [-.01; .23]    |
| Spatial Intelligence         | .06 [-.06; .18]     | .11 [-.03; .23]    |

*Note.* \*  $p < .05$ . \*\*  $p < .01$ . \*\*\*  $p < .001$ .  $N = 257$ . For non-normally distributed variables (verbal intelligence), interpretation is based on the depicted 95% BCa bootstrapping confidence intervals for 2000 samples.

**Table S2***Intercorrelations of Intelligence Measures, Personality Traits, and Additional Variables (Exploratory Analyses)*

|                                        | 1       | 2       | 3    | 4       | 5      | 6       | 7       | 8     | 9      | 10     | 11     | 12  | 13   |
|----------------------------------------|---------|---------|------|---------|--------|---------|---------|-------|--------|--------|--------|-----|------|
| 1) Estimated General Intelligence (IQ) | -       |         |      |         |        |         |         |       |        |        |        |     |      |
| 2) General Intelligence (z-score)      | .47***  | -       |      |         |        |         |         |       |        |        |        |     |      |
| 3) Implicit Theories of Intelligence   | .13*    | .17**   | -    |         |        |         |         |       |        |        |        |     |      |
| 4) Neuroticism                         | -.20*** | -.08    | .08  | -       |        |         |         |       |        |        |        |     |      |
| 5) Openness                            | .13*    | .12     | .09  | .03     | -      |         |         |       |        |        |        |     |      |
| 6) Extraversion                        | .01     | -.05    | -.06 | -.35*** | .13*   | -       |         |       |        |        |        |     |      |
| 7) Agreeableness                       | -.12*   | -.07    | -.04 | -.22*** | .07    | .31***  | -       |       |        |        |        |     |      |
| 8) Conscientiousness                   | -.04    | -.05    | -.07 | -.11    | .07    | .25***  | .07     | -     |        |        |        |     |      |
| 9) Machiavellianism                    | .01     | .03     | <.01 | .13*    | -.02   | -.07    | -.35*** | -.13* | -      |        |        |     |      |
| 10) Psychopathy                        | .19***  | .05     | -.04 | -.12    | -.14*  | -.14*   | -.41*** | -.09  | .43*** | -      |        |     |      |
| 11) Grandiose Narcissism               | .10     | .16**   | .10  | .19***  | .07    | .15*    | -.16**  | -.03  | .44*** | .20*** | -      |     |      |
| 12) Vulnerable Narcissism              | -.05    | -.03    | .06  | .54***  | .05    | -.45*** | -.35*** | -.07  | .24*** | .18*** | .25*** | -   |      |
| 13) Science-Fiction Hobbyism           | .18**   | .19***  | .02  | .02     | .23*** | -.06    | -.01    | -.12  | .01    | -.01   | .04    | .09 | -    |
| 14) Purity Norms                       | -.11    | -.32*** | -.11 | .08     | -.03   | <.01    | -.04    | .14*  | -.08   | -.16** | -.10   | .08 | -.09 |

Note. \*  $p < .05$ . \*\*  $p < .01$ . \*\*\*  $p < .001$ .  $N = 257$ .

**Table S3**

*Multiple Hierarchical Regression Analysis with the Criterion “Acceptance of Active Enhancement” (Exploratory Analysis)*

| Active Enhancement                          |                       |              |            |          |          |
|---------------------------------------------|-----------------------|--------------|------------|----------|----------|
|                                             | <i>R</i> <sup>2</sup> | $\Delta R^2$ | $\Delta F$ | <i>B</i> | <i>t</i> |
| Model 1                                     | .12                   | .12          | 34.79***   |          |          |
| Age                                         |                       |              |            | -.35     | -5.89*** |
| Model 2                                     | .14                   | .02          | 1.47       |          |          |
| Age                                         |                       |              |            | -.33     | -5.51*** |
| General Intelligence                        |                       |              |            | .05      | 0.43     |
| Estimated Verbal Intelligence (Single-Item) |                       |              |            | .04      | 0.53     |
| Estimated Verbal Intelligence (Multi-Item)  |                       |              |            | .08      | 1.13     |
| Model 3                                     | .20                   | .06          | 6.23***    |          |          |
| Age                                         |                       |              |            | -.32     | -5.38*** |
| General Intelligence (z-score)              |                       |              |            | .01      | 0.09     |
| Estimated Verbal Intelligence (Single-Item) |                       |              |            | .03      | 0.35     |
| Estimated Verbal Intelligence (Multi-Item)  |                       |              |            | .01      | 0.19     |
| Openness                                    |                       |              |            | .21      | 3.41***  |
| Machiavellianism                            |                       |              |            | .09      | 1.42     |
| Grandiose Narcissism                        |                       |              |            | .09      | 1.39     |
| Model 4                                     | .22                   | .03          | 4.73*      |          |          |
| Age                                         |                       |              |            | -.29     | -5.02*** |
| General Intelligence                        |                       |              |            | -.05     | -0.73    |
| Estimated Verbal Intelligence (Single-Item) |                       |              |            | .04      | 0.57     |
| Estimated Verbal Intelligence (Multi-Item)  |                       |              |            | <-.01    | -.03     |
| Openness                                    |                       |              |            | .18      | 2.91**   |
| Machiavellianism                            |                       |              |            | .09      | 1.35     |
| Grandiose Narcissism                        |                       |              |            | .09      | 1.42     |
| Science-Fiction Hobbyism                    |                       |              |            | .15      | 2.59*    |
| Purity Norms                                |                       |              |            | -.09     | -1.59    |

*Note.* \* $p < .05$ , \*\* $p < .01$ , \*\*\* $p < .001$ ;  $N = 257$ . Please note that entering the two self-estimate measures in separate steps does not change the results in a meaningful way.
